# Supplementary material
Source: PubMed Central journal article supplement (PMC3479837)
Supplement: neo1410_0915SD1.pdf [file neo1410_0915SD1.pdf]

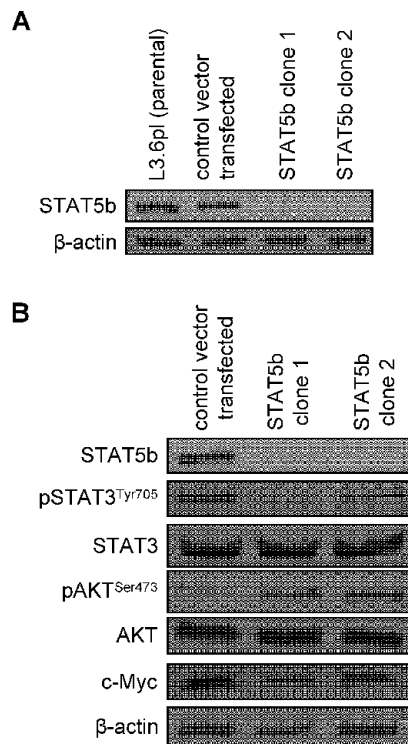

**Figure W1.** Effects of targeting STAT5b on signaling in the L3.6pl human pancreatic cancer cell line *in vitro*. (A) Knockdown of STAT5b in L3.6pl human pancreatic cancer cells using an shRNA approach was verified by Western blot analysis. (B) Inhibition of STAT5b leads to a reduction of constitutive STAT3 phosphorylation and c-Myc expression in cancer cells. Phosphorylation of AKT<sup>Ser473</sup> was observed on STAT5b blockade *in vitro*.

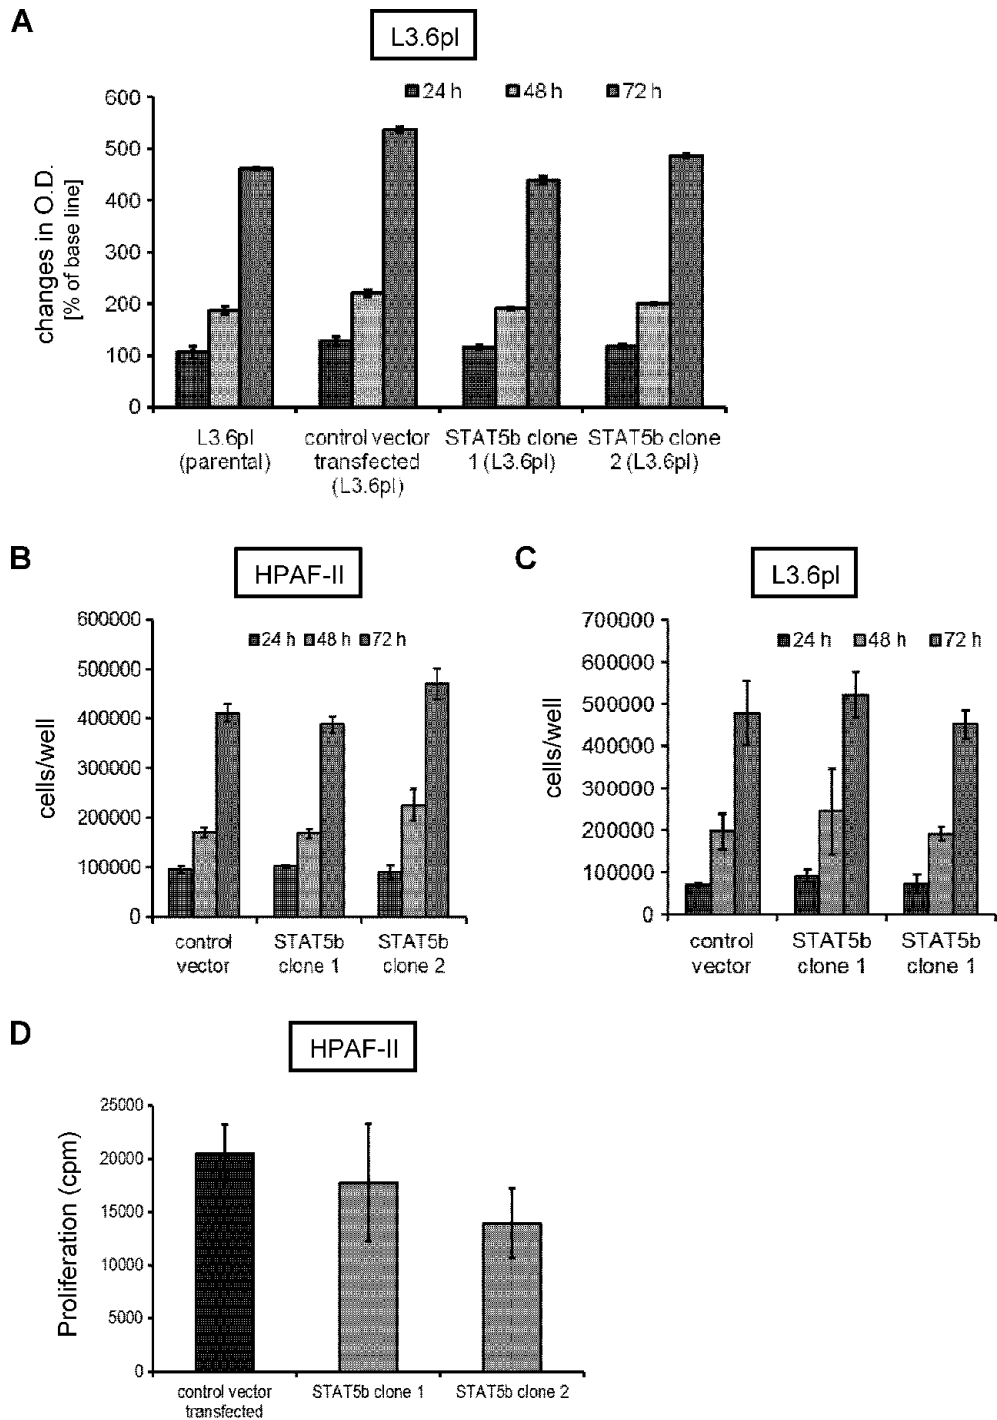

**Figure W2.** Effects of STAT5b knockdown on growth of pancreatic cancer cell lines *in vitro*. (A) Knockdown of STAT5b in L3.6pl has no effects on the growth of tumor cells *in vitro*, as determined by MTT assay. (B and C) No inhibition of growth was observed in cell count assays up to 72 hours for HPAF-II and L3.6pl cells. (D) [<sup>3</sup>H]thymidine incorporation assays did not show a significant inhibition of tumor cell proliferation up to 96 hours for HPAF-II cells with stable STAT5b knockdown compared to controls. Bars, SEM.

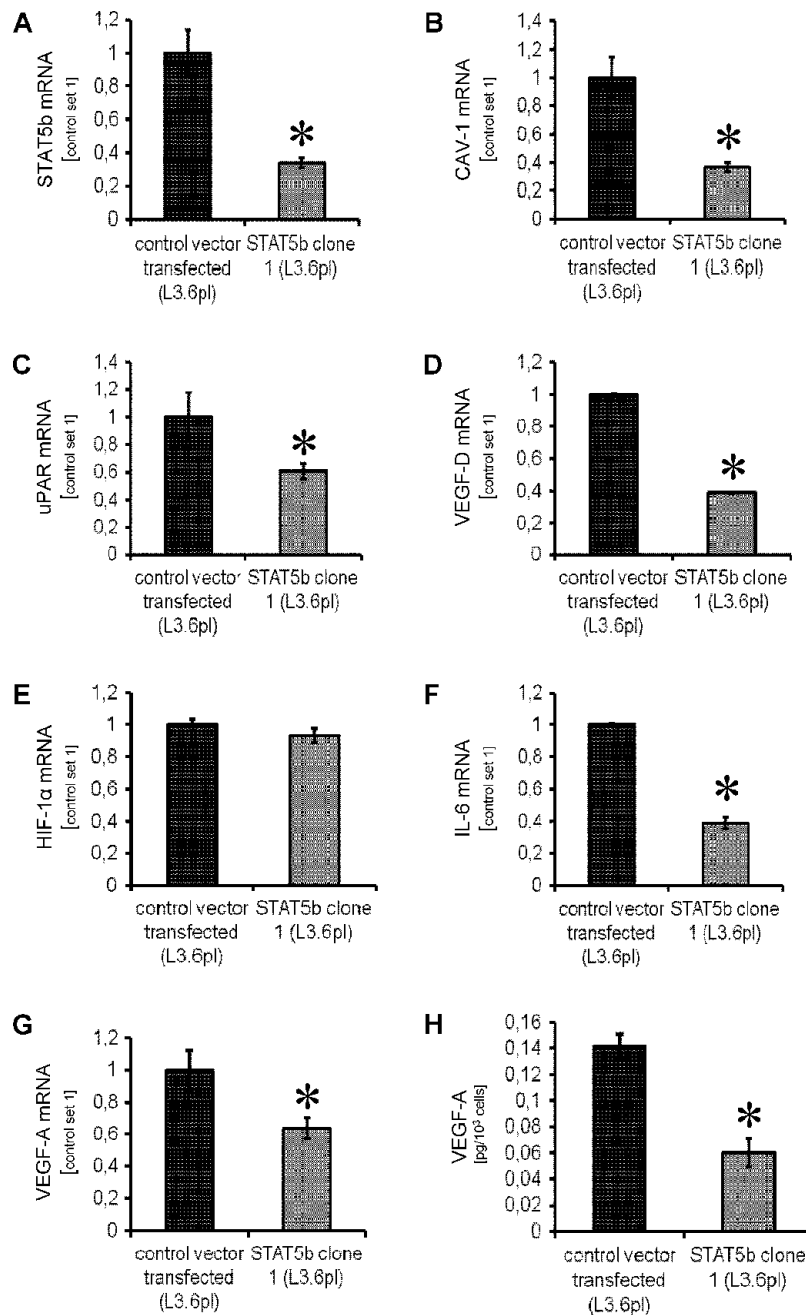

**Figure W3.** Targeting STAT5b affects metastasis and angiogenesis mediators in L3.6pl human pancreatic cancer cells. (A) shRNA-mediated knockdown of STAT5b was verified by PCR (L3.6pl cells). (B–D) Stable shRNA-mediated knockdown of STAT5b significantly reduces mRNA expression of metastatic factors CAV-1, uPAR, and VEGF-D in L3.6pl pancreatic cancer cells ( $*P < .05$ ). (E) No effects of STAT5b on HIF-1 $\alpha$  mRNA expression were observed in L3.6pl pancreatic cancer cells. (F) Inhibition of STAT5b leads to a significant IL-6 mRNA expression reduction in L3.6pl cells ( $*P < .05$ ). (G) VEGF-A mRNA was significantly reduced in L3.6pl STAT5b knockdown clones ( $*P < .05$ ). (H) Decreased VEGF-A secretion was confirmed at a protein level (ELISA) in L3.6pl cells *in vitro* ( $*P < .05$ ). Bars, SEM.

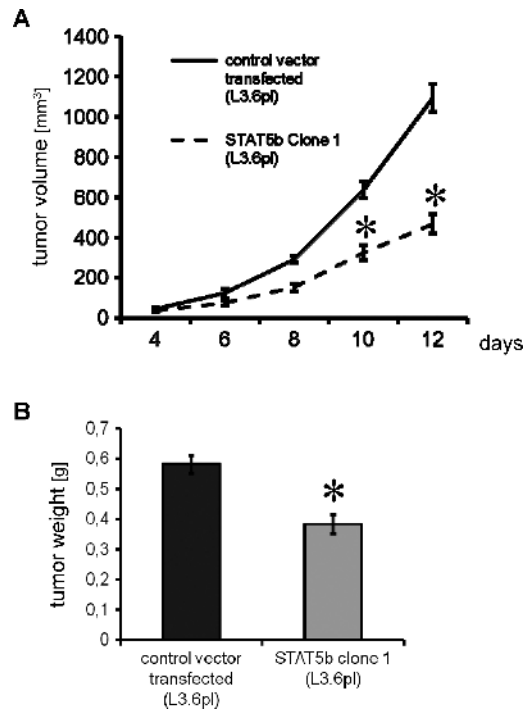

**Figure W4.** Subcutaneous L3.6pl pancreatic cancer tumor model growth is inhibited on STAT5b knockdown. (A) Stable shRNA-mediated knockdown of STAT5b leads to a significant inhibition of subcutaneous tumor growth ( $*P < .05$ ). (B) Growth inhibition was reflected by final tumor weight ( $*P < .05$ ).
